# Supplementary material for: Does an Extraoral Suction Device Reduce Aerosol Generation and Prevent Droplet Exposure to the Examiner during Esophagogastroduodenoscopy?
Source: MDPI journal article supplement (doi:10.3390/jcm12072574), 2023-03-29
Supplement: s1 [file s1]

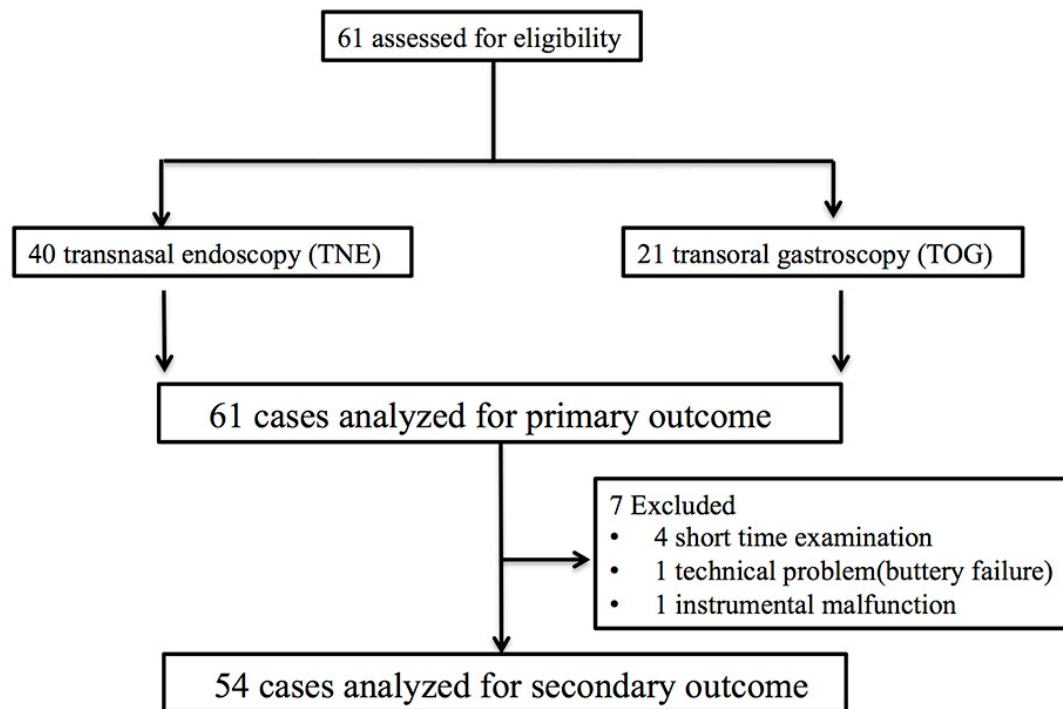

**Supplemental Figure S1.** Patient enrollment. TNE, transnasal endoscopy. TOG, transoral gastroscopy

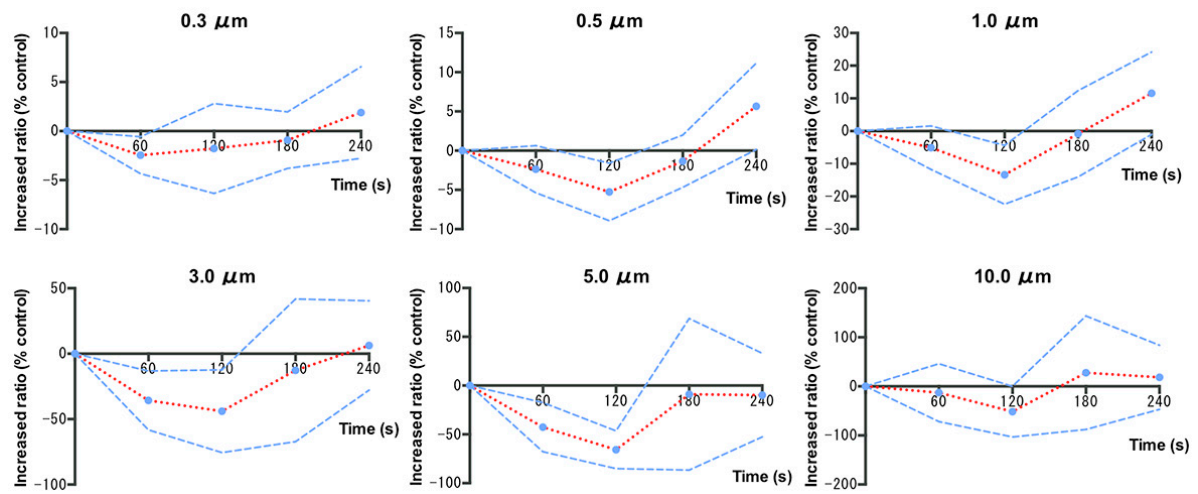

**Supplemental Figure S2.** Percentage increase in aerosol particles of 0.3, 0.5, 1, 3, 5, and 10  $\mu\text{m}$  in size at 60, 120, 180 and 240 seconds from the start of esophagogastroduodenoscopy without an extraoral suction device ( $n = 8$ ). The lines represent the mean particle count of the eight patients. The blue dotted line indicates the 95% confidence interval.

**Supplemental Table S1.** Comparison of baseline characteristics of nasal endoscopy (TNE) and transoral endoscopes (TOE) with extraoral suction device.

|                                       | <b>Transnasal endoscopy<br/>n=40</b> | <b>Transoral endoscopy<br/>n=21</b> | <b>P-value</b> |
|---------------------------------------|--------------------------------------|-------------------------------------|----------------|
| <b>Mean age ± SD, y</b>               | 61.9±15.4                            | 71.0±16.2                           | 0.0197         |
| <b>Male sex, no (%)</b>               | 22 (61.6)                            | 14 (66.7)                           | 0.4234         |
| <b>Medical history, n(%)</b>          | 15 (37.5)                            | 6 (28.0)                            | 0.5773         |
| <b>Mean procedure time ± SD, secs</b> | 203.1± 55.7                          | 160.3± 66.4                         | 0.0013         |
| <b>Cough, n(%)</b>                    | 11(27.5)                             | 6(28.6)                             | 1.0000         |
| <b>Reflex vomitting, n(%)</b>         | 6(15.0)                              | 6(28.6)                             | 0.3093         |
| <b>Sneezing, n(%)</b>                 | 0 (0)                                | 0 (0)                               |                |
| <b>Burping, n(%)</b>                  | 8(20)                                | 11(52.4)                            | 0.0184         |
| <b>Body movement, n(%)</b>            | 1(2.5)                               | 2(9.5)                              | 0.2704         |
| <b>Interventions, n(%)</b>            |                                      |                                     |                |
| <b>No</b>                             | 33(82.5%)                            | 20(95.2%)                           | 0.2434         |
| <b>Biopsy</b>                         | 8 (13.1)                             | 8 (13.1)                            |                |

**Supplemental Table S2.** Comparison of changes in aerosol counts and ATP levels between transnasal endoscopy (TNE) and transoral endoscopy (TOE) with an extraoral suction device.

|                                                      | Transnasal endoscopy |                  |                               | Transoral endoscopy |                 |                               | P-value |
|------------------------------------------------------|----------------------|------------------|-------------------------------|---------------------|-----------------|-------------------------------|---------|
|                                                      | Before               | After            | $\Delta(\text{After-Before})$ | Before              | After           | $\Delta(\text{After-Before})$ |         |
| Mean counts<br>( $\times 10^6/\text{m}^3$ ) $\pm$ SD |                      |                  |                               |                     |                 |                               |         |
| 0.3 $\mu\text{m}$                                    | 25.6 $\pm$ 13.2      | 28.8 $\pm$ 15.5  | 3.2 $\pm$ 3.0                 | 26.0 $\pm$ 16.2     | 29.4 $\pm$ 19.3 | 28.9 $\pm$ 16.1               | 0.5641  |
| 0.5 $\mu\text{m}$                                    | 2.5 $\pm$ 1.5        | 2.8 $\pm$ 1.8    | 0.3 $\pm$ 0.4                 | 2.8 $\pm$ 2.2       | 3.1 $\pm$ 2.7   | 2.9 $\pm$ 2.1                 | 0.8913  |
| 1.0 $\mu\text{m}$                                    | 0.2 $\pm$ 0.8        | 0.3 $\pm$ 0.1    | 0.01 $\pm$ 0.06               | 0.3 $\pm$ 1.3       | 2.6 $\pm$ 1.5   | 0.3 $\pm$ 1.2                 | 0.7905  |
| Mean counts<br>( $\times 10^3/\text{m}^3$ ) $\pm$ SD |                      |                  |                               |                     |                 |                               |         |
| 3.0 $\mu\text{m}$                                    | 12.4 $\pm$ 11.4      | 9.5 $\pm$ 5.2    | -2.9 $\pm$ 10.4               | 9.4 $\pm$ 3.6       | 7.8 $\pm$ 3.7   | -1.7 $\pm$ 5.5                | 0.6818  |
| 5.0 $\mu\text{m}$                                    | 3.7 $\pm$ 4.8        | 2.8 $\pm$ 2.1    | -0.9 $\pm$ 4.5                | 2.4 $\pm$ 1.5       | 1.9 $\pm$ 1.0   | -4.5 $\pm$ 1.8                | 0.6703  |
| 10.0 $\mu\text{m}$                                   | 2.6 $\pm$ 3.5        | 1.7 $\pm$ 1.5    | -0.9 $\pm$ 3.3                | 1.5 $\pm$ 1.0       | 1.2 $\pm$ 0.6   | -3.2 $\pm$ 1.1                | 0.3165  |
| ATP level<br>(RLU)                                   | 8.4 $\pm$ 7.6        | 83.9 $\pm$ 275.9 | 75.5 $\pm$ 277.3              | 8.0 $\pm$ 7.6       | 26.4 $\pm$ 36.4 | 18.4 $\pm$ 36.6               | 0.0974  |
